# Supplementary material for: Photocatalytic degradation of diphenhydramine in aqueous solution by natural dolomite
Source: Royal Society of Chemistry journal article supplement (doi:10.1039/d0ra07533g), 2020-01-01
Supplement: d0ra07533g1.pdf [file d0ra07533g1.pdf]

## Supporting information

for

### Photocatalytic degradation of diphenhydramine in aqueous solution by natural dolomite

Lihong Song<sup>a</sup>, Chunlin Yi<sup>a</sup>, Qingfeng Wu<sup>a,\*</sup>, Zhaohui Li<sup>b,\*</sup>, Weibin Zhang<sup>a</sup>, Hanlie Hong<sup>c</sup>

<sup>a</sup>School of Physics and Optoelectronic Engineering, Yangtze University, 1 Nanhuan Road, Jingzhou, Hubei 434023, China

<sup>b</sup>Department of Geosciences, University of Wisconsin-Parkside, 900 Wood Road, Kenosha, WI 53144, USA

<sup>c</sup>Faculty of Earth Sciences, China University of Geosciences, 388 Lumo Road, Wuhan, Hubei 430074, China

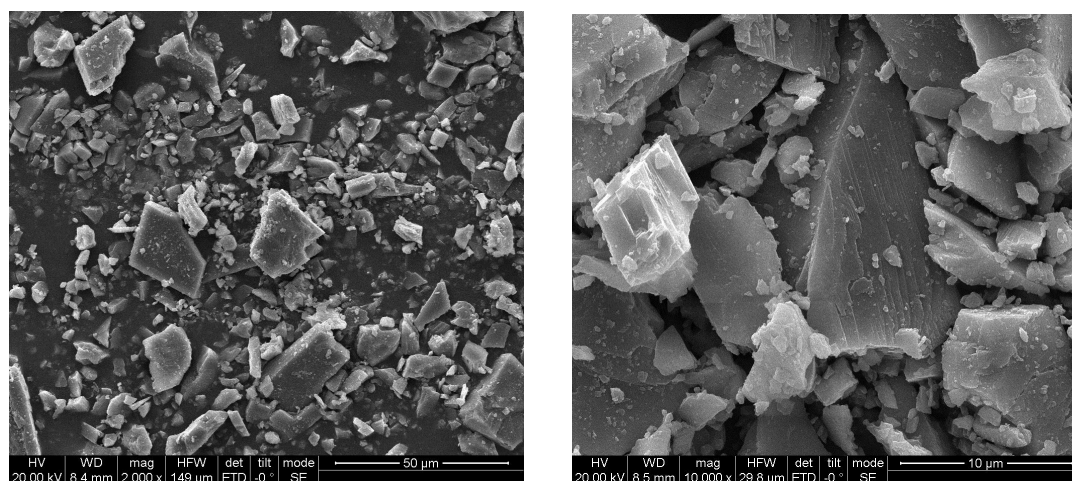

**Fig. S1.** SEM image of the natural dolomite at different magnifications

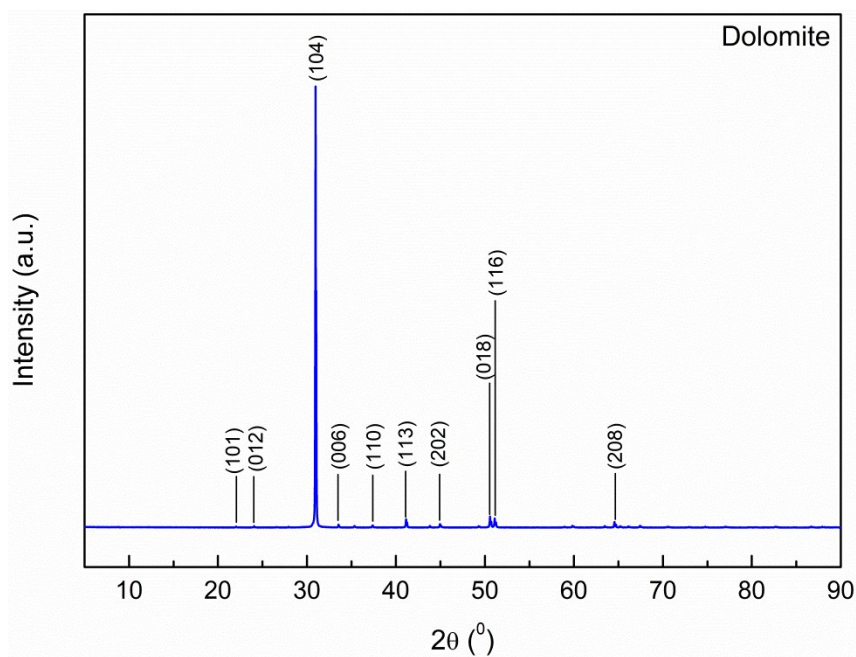

**Fig. S2.** XRD pattern of the natural dolomite sample.

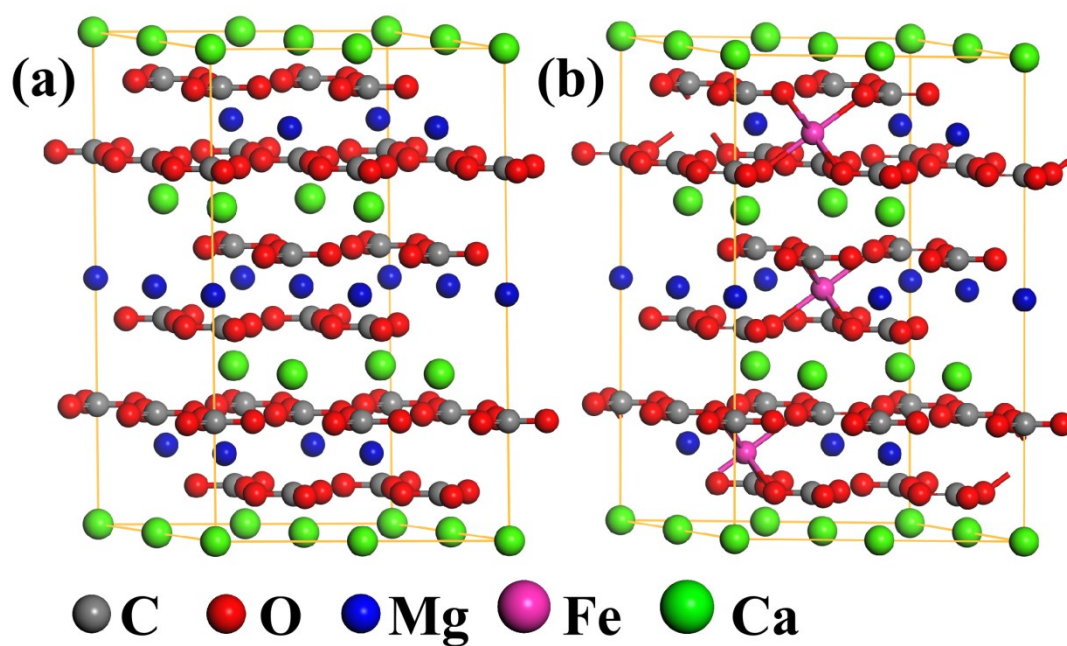

**Fig. S3.** The optimized structures of (a) the  $2 \times 2 \times 1$  dolomite supercell, and (b) the supercell with 3  $\text{Fe}^{2+}$  substitution for 3  $\text{Mg}^{2+}$ .

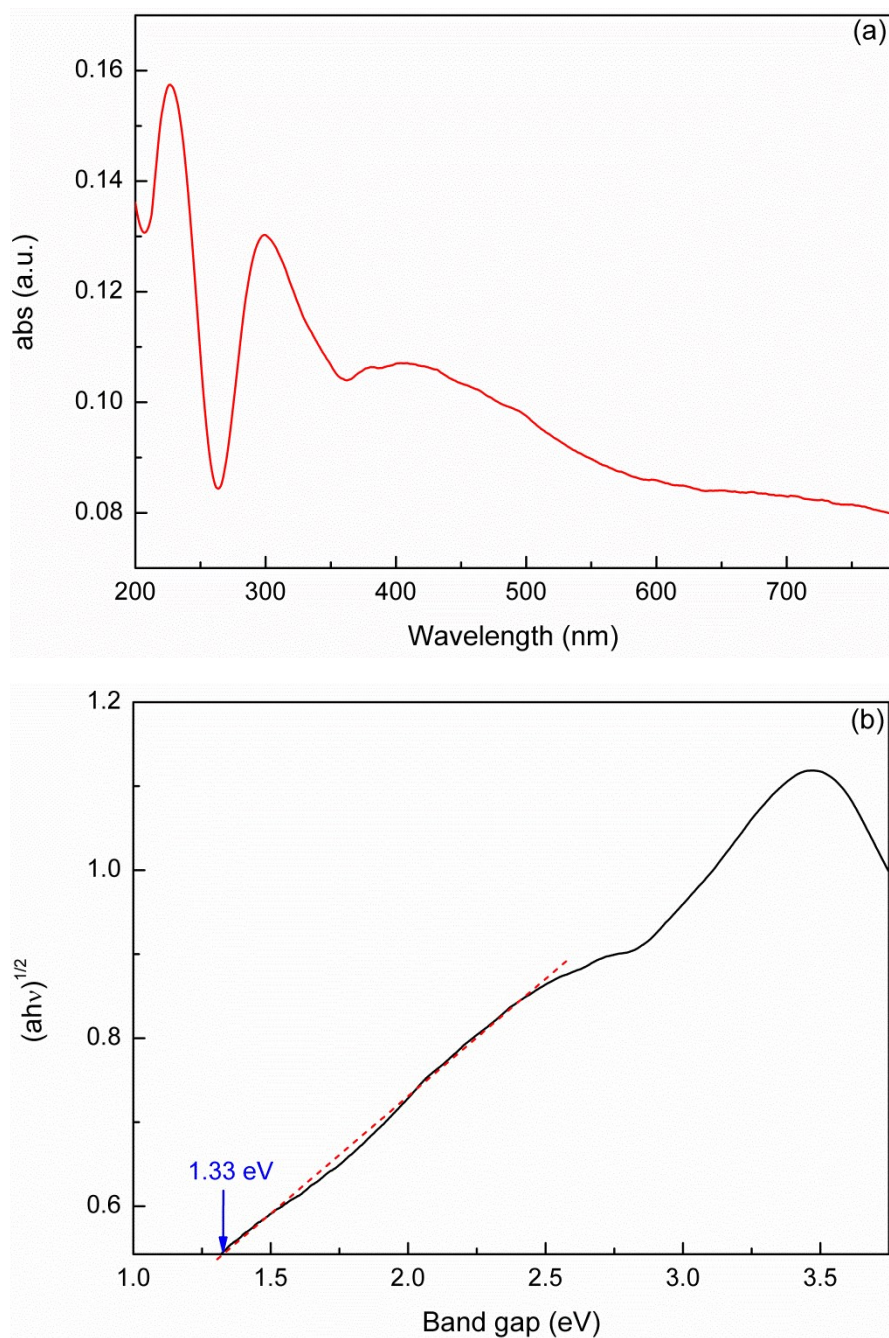

**Fig. S4.** The UV-Vis reflectance spectra of natural dolomite (a), and estimated band gap from UV-Vis spectra (b).

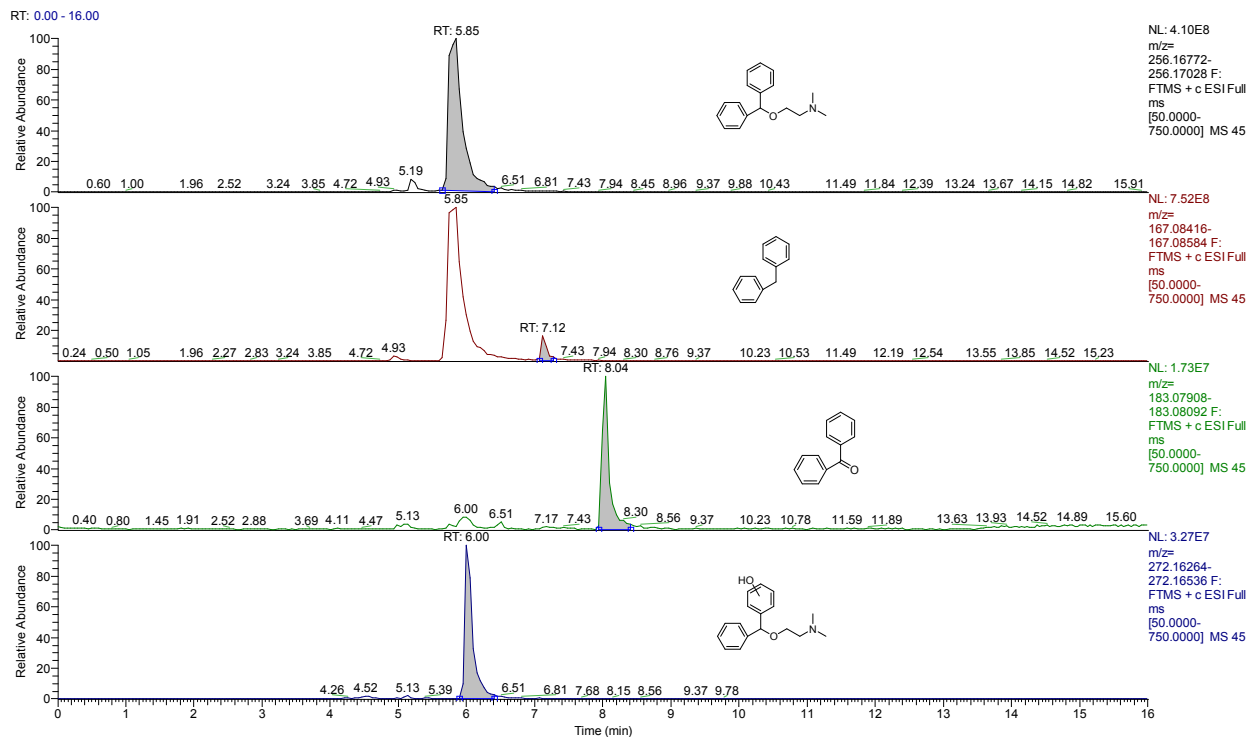

45 #2499 RT: 5.80 AV: 1 SB: 6 7.56-7.86 NL: 7.36E8  
T: FTMS + c ESI Full ms [50.0000-750.0000]

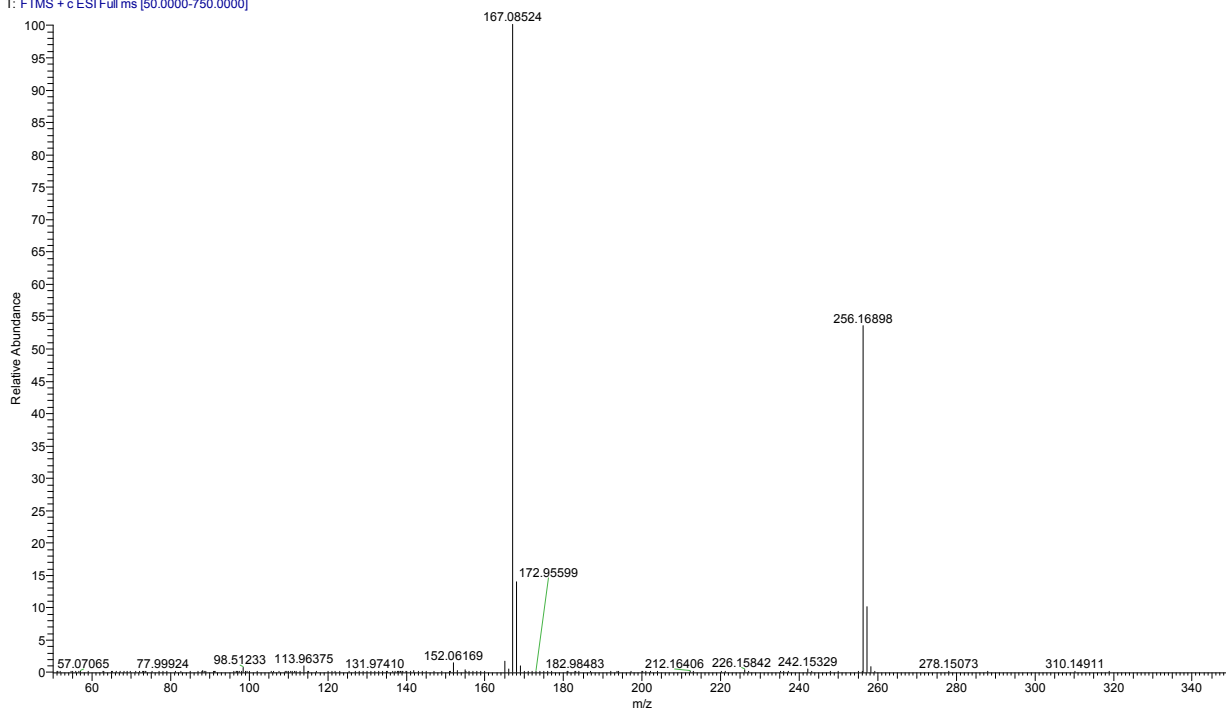

45 #2499 RT: 5.80 AV: 1 SB: 6 7.56-7.86 NL: 3.93E8  
T: FTMS + c ESI Full ms [50.0000-750.0000]

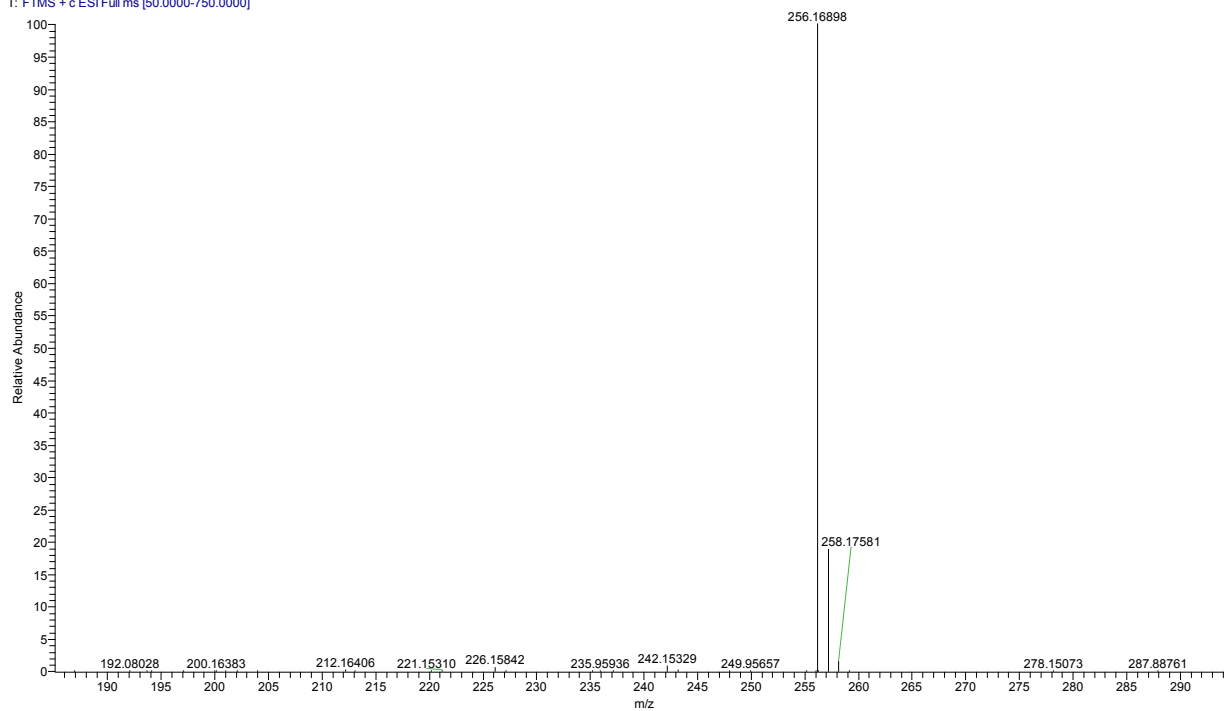

45 #3071 RT: 7.12 AV: 1 SB: 6 7.56-7.86 NL: 1.20E8  
T: FTMS + c ESI Full ms [50.0000-750.0000]

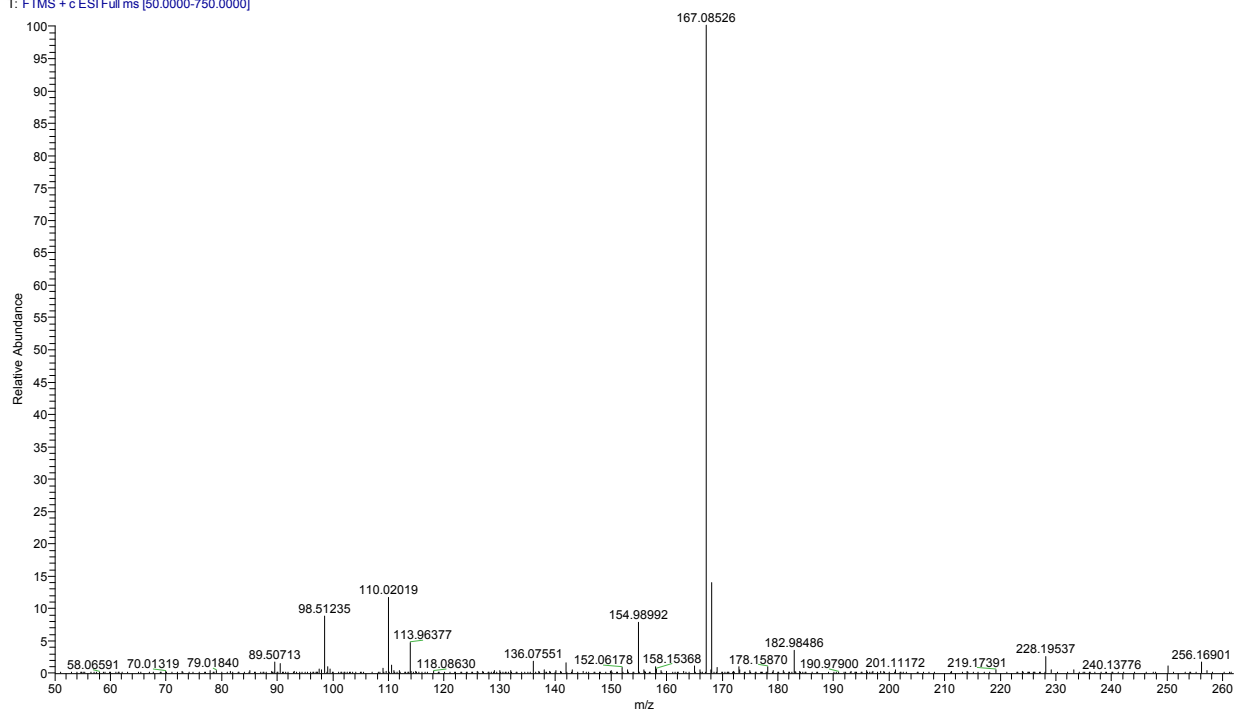

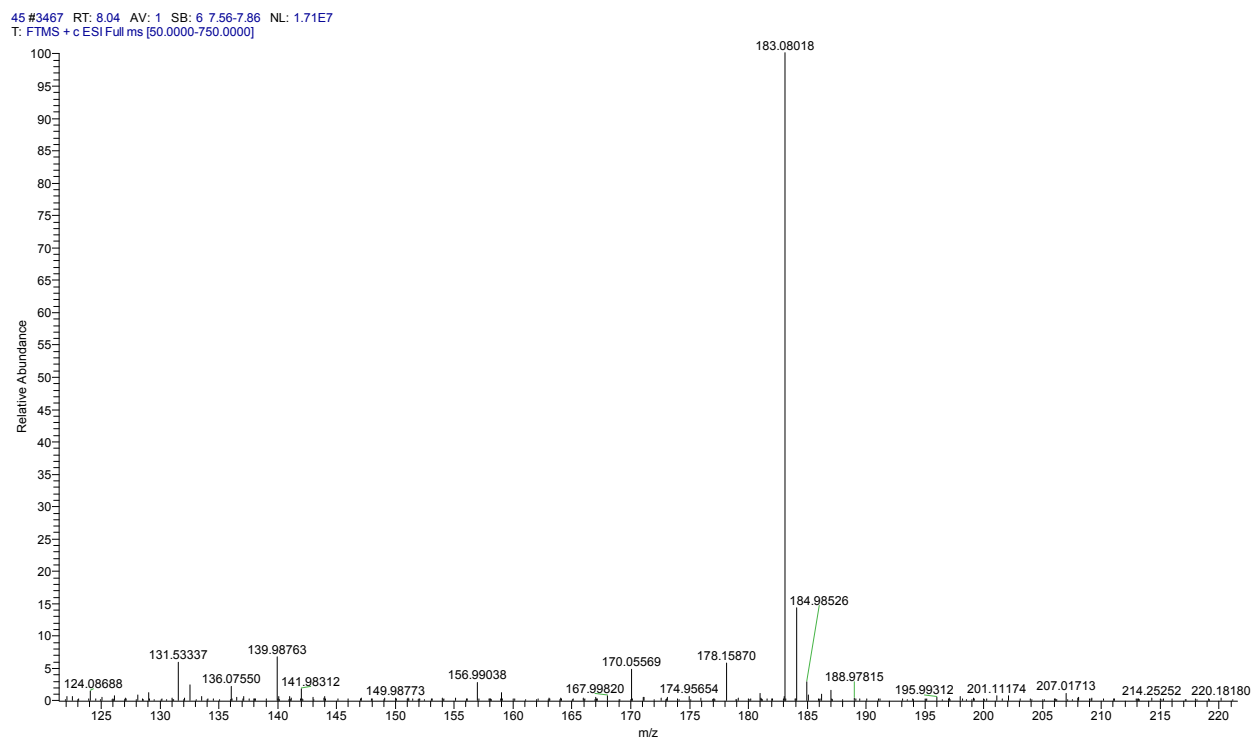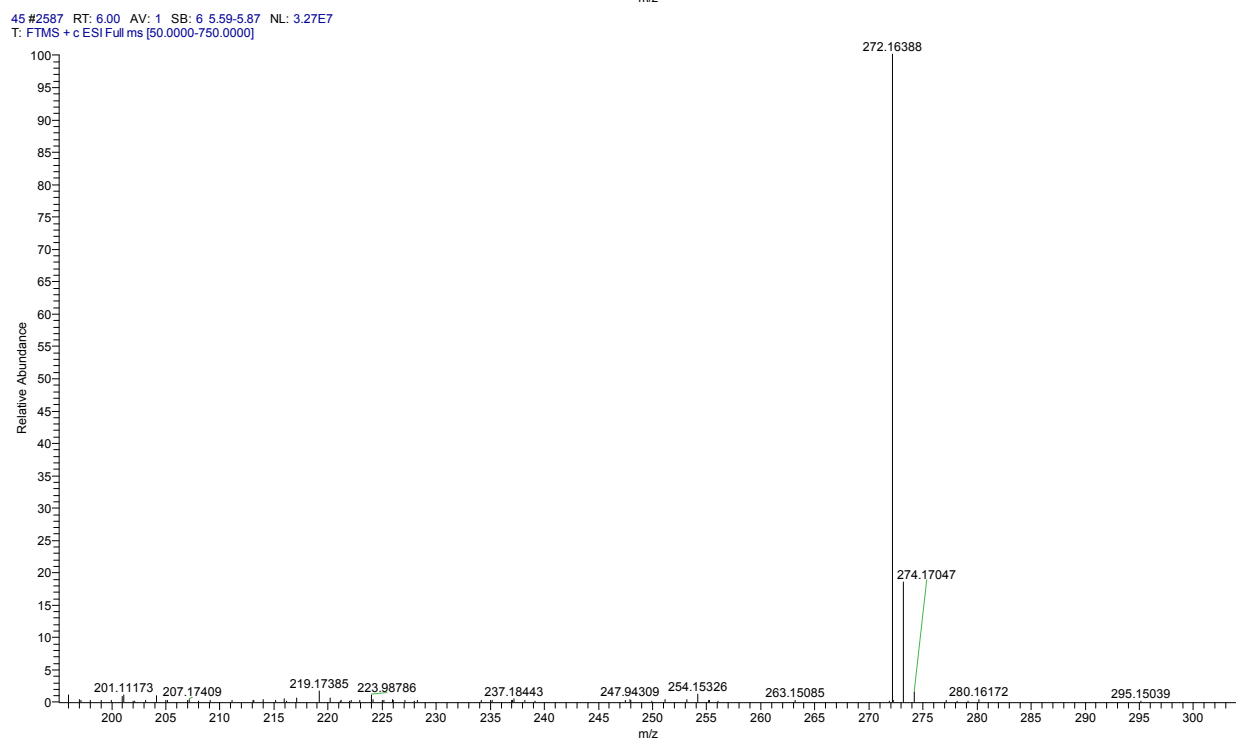

**Fig. S5.** HRMS spectra of major byproducts after 45 min irradiation in the presence of natural dolomite.
